# Supplementary material
Source: PubMed Central journal article supplement (PMC3652920)
Supplement: 112.048462_ajcn048462SupplementaryData.pdf [file 112.048462_ajcn048462SupplementaryData.pdf]

## ONLINE SUPPLEMENTAL MATERIAL to

DNA methylation potential: dietary intake and blood concentrations of one-carbon metabolites and cofactors in rural African women

Dominguez Salas P *et al.*

**Supplemental Table S1:** Food composition tables for one-carbon metabolites and cofactors of common Gambian foods assessed (composition per 100g)

| <b>Ingredient</b>                             | <b>N</b> | <b>Folate<br/>(<math>\mu\text{g}</math>)<sup>1</sup></b> | <b>Methionine<br/>(g)<sup>2</sup></b> | <b>B12<br/>(<math>\mu\text{g}</math>)<sup>1,4</sup></b> | <b>Riboflavin<br/>(mg)<sup>2</sup></b> | <b>B6<br/>(mg)<sup>2</sup></b> | <b>Choline<br/>(mg)<sup>3</sup></b> | <b>Betaine<br/>(mg)<sup>3</sup></b> |
|-----------------------------------------------|----------|----------------------------------------------------------|---------------------------------------|---------------------------------------------------------|----------------------------------------|--------------------------------|-------------------------------------|-------------------------------------|
| Atayah (green tea)                            | 3        | <5                                                       | <0.02                                 | <0.20                                                   | <0.02                                  | 0.04                           | 18.23                               | 6.94                                |
| Aubergine                                     | 5        | <5.0                                                     | 0.05                                  | <0.20                                                   | <0.01                                  | <0.01                          | 8.18                                | 0.13                                |
| Baobab seeds                                  | 5        | 35                                                       | 0.04                                  | 0.44                                                    | <0.05                                  | 0.04                           | 13.36                               | 0.89                                |
| Beans                                         | 5        | 82                                                       | 0.36                                  | 0.39                                                    | 0.03                                   | 0.18                           | 155.80                              | 3.83                                |
| Biscuits                                      | 5        | <5.0                                                     | 0.11                                  | <0.20                                                   | <0.01                                  | 0.08                           | 13.05                               | 44.20                               |
| Bitter Tomato                                 | 5        | 11                                                       | 0.03                                  | 0.24                                                    | 0.02                                   | 0.05                           | 18.03                               | 0.04                                |
| Black pepper                                  | 4        | <5.0                                                     | 0.16                                  | 1.6                                                     | 0.14                                   | 0.34                           | 46.67                               | 1.29                                |
| Bread                                         | 5        | 10                                                       | 0.14                                  | 0.78                                                    | <0.01                                  | 0.03                           | 12.89                               | 44.32                               |
| Butternut squash                              | 5        | <5.0                                                     | <0.02                                 | <0.20                                                   | <0.05                                  | 0.01                           | 4.10                                | 0.02                                |
| Cabbage                                       | 4        | 32                                                       | 0.03                                  | 1.1                                                     | 0.01                                   | 0.1                            | 14.09                               | 0.31                                |
| Cassava                                       | 5        | 7.2                                                      | 0.03                                  | 5.9                                                     | <0.01                                  | 0.04                           | 6.33                                | 0.19                                |
| Chilli pepper, big                            | 7        | 12                                                       | 0.06                                  | <0.20                                                   | 0.14                                   | 0.4                            | 16.63                               | 3.23                                |
| Chilli pepper, dried                          | 4        | 8.4                                                      | 0.19                                  | 0.48                                                    | 0.15                                   | 1.5                            | 101.38                              | 7.02                                |
| Coffee                                        | 5        | 42                                                       | 0.12                                  | 1.9                                                     | <0.01                                  | 22.2                           | 72.27                               | 13.80                               |
| Condiments                                    | 5        | <5.0                                                     | 0.03                                  | <0.20                                                   | <0.01                                  | 1.55                           | 8.57                                | 2.66                                |
| Egg, dry season                               | 5        | <5.0                                                     | 0.3                                   | 1.2                                                     | 0.22                                   | 0.03                           | 231.57                              | 0.83                                |
| Egg, wet season                               | 5        | 13                                                       | 0.48                                  | 2.9                                                     | 0.36                                   | 0.05                           | 214.30                              | 1.06                                |
| Fish (challo), dried                          | 4        | <5.0                                                     | 0.58                                  | <0.20                                                   | 0.15                                   | 0.14                           | 50.36                               | 27.35                               |
| Fish (challo), fresh                          | 6        | 23                                                       | 0.5                                   | 9.8                                                     | 0.03                                   | 0.09                           | 36.10                               | 4.19                                |
| Fish, dried                                   | 6        | 9.7                                                      | 0.54                                  | 21                                                      | 0.08                                   | 0.11                           | 43.84                               | 22.93                               |
| Fish (jeja, lambasiso, tutuno, kotore), fresh | 5        | 12                                                       | 0.47                                  | 7.6                                                     | 0.04                                   | 0.31                           | 38.81                               | 334.49                              |
| Fish (joto, furo), fresh                      | 6        | 15                                                       | 0.55                                  | 4.3                                                     | 0.15                                   | 0.07                           | 39.23                               | 3.08                                |
| Fish (kujalo, kunkolongo, salango), fresh     | 5        | 15                                                       | 0.65                                  | 3.4                                                     | 0.07                                   | 0.07                           | 48.95                               | 43.04                               |
| Fish (moroko, kong, kungo, chalmoroo), fresh  | 5        | 23                                                       | 0.56                                  | 17                                                      | 0.07                                   | 0.17                           | 43.19                               | 22.26                               |
| Fish, pie                                     | 3        | <5.0                                                     | 0.13                                  | 1.4                                                     | <0.05                                  | 0.05                           | 15.51                               | 30.15                               |
| Fish, smoked                                  | 6        | 7.8                                                      | 0.91                                  | 13                                                      | 0.1                                    | 0.36                           | 57.27                               | 16.39                               |
| Fish (tambanjango), fresh                     | 6        | 23                                                       | 0.45                                  | 4.8                                                     | 0.13                                   | 0.06                           | 39.30                               | 4.89                                |
| Garlic                                        | 3        | 6.8                                                      | 0.06                                  | 0.37                                                    | <0.01                                  | 0.57                           | 22.59                               | 11.70                               |
| Groundnut, paste                              | 6        | 21                                                       | 0.32                                  | 0.24                                                    | <0.01                                  | 0.35                           | 122.79                              | 3.12                                |
| Groundnut, roasted                            | 5        | 18                                                       | 0.28                                  | <0.20                                                   | <0.01                                  | 0.16                           | 99.27                               | 1.74                                |
| Groundnuts, cooked                            | 7        | 11                                                       | 0.25                                  | <0.20                                                   | 0.02                                   | 0.07                           | 104.19                              | 1.40                                |

| <b>Ingredient</b>             | <b>N</b> | <b>Folate<br/>(µg)<sup>1</sup></b> | <b>Methionine<br/>(g)<sup>2</sup></b> | <b>B12<br/>(µg)<sup>1,4</sup></b> | <b>Riboflavin<br/>(mg)<sup>2</sup></b> | <b>B6<br/>(mg)<sup>2</sup></b> | <b>Choline<br/>(mg)<sup>3</sup></b> | <b>Betaine<br/>(mg)<sup>3</sup></b> |
|-------------------------------|----------|------------------------------------|---------------------------------------|-----------------------------------|----------------------------------------|--------------------------------|-------------------------------------|-------------------------------------|
| Groundnuts, raw, dry season   | 5        | 8.4                                | 0.25                                  | <0.20                             | <0.01                                  | 0.07                           | 106.90                              | 1.26                                |
| Groundnuts, raw, rainy season | 5        | 14                                 | 0.28                                  | <0.20                             | <0.01                                  | 0.08                           | 119.05                              | 1.89                                |
| Juice powder                  | 3        | <25                                | <0.02                                 | 1.5                               | <0.05                                  | 0.06                           | 0.17                                | 0.11                                |
| Kola nut                      | 4        | 11                                 | 0.03                                  | <0.20                             | <0.01                                  | 0.02                           | 20.77                               | 396.33                              |
| Leaves, baobab, dry (naa)     | 8        | 55                                 | 0.2                                   | 4.6                               | 0.33                                   | 0.75                           | 29.71                               | 14.95                               |
| Leaves, cassava, fresh        | 5        | 35                                 | 0.17                                  | 0.58                              | 0.22                                   | 0.17                           | 32.54                               | 1.75                                |
| Leaves, jambo nduroo, dried   | 3        | 26                                 | 0.51                                  | 1.7                               | 0.73                                   | 1.41                           | 157.10                              | 6.93                                |
| Leaves, jambo nduroo, fresh   | 4        | 23                                 | 0.21                                  | 0.99                              | 0.23                                   | 0.6                            | 28.79                               | 2.71                                |
| Leaves, kereng kereng, fresh  | 4        | 23                                 | 0.17                                  | 1.3                               | 0.17                                   | 0.36                           | 25.82                               | 1.28                                |
| Leaves, kucha, dried          | 3        | 37                                 | 0.29                                  | 31                                | 0.7                                    | 1.1                            | 65.23                               | 479.77                              |
| Leaves, kucha, fresh          | 8        | 8.1                                | 0.09                                  | 0.3                               | 0.06                                   | 0.2                            | 13.81                               | 45.87                               |
| Leaves, morongo, fresh        | 6        | 32                                 | 0.19                                  | 0.58                              | 0.28                                   | 0.19                           | 36.80                               | 128.10                              |
| Leaves, onion, fresh          | 4        | 38                                 | 0.05                                  | 0.54                              | 0.06                                   | 0.09                           | 10.65                               | 0.91                                |
| Leaves, sweet potato, fresh   | 5        | 26                                 | 0.17                                  | 1.3                               | 0.15                                   | 0.13                           | 20.34                               | 16.95                               |
| Locus beans                   | 4        | 210                                | 0.15                                  | 3.9                               | 0.19                                   | 1.6                            | 35.41                               | 2.32                                |
| Macaroni                      | 5        | <5.0                               | 0.13                                  | <0.20                             | <0.01                                  | 0.05                           | 7.16                                | 42.66                               |
| Maize, flour                  | 5        | 13                                 | 0.13                                  | <0.20                             | 0.13                                   | 0.11                           | 56.07                               | 3.60                                |
| Maize, roast                  | 5        | 27                                 | 0.15                                  | <0.20                             | 0.04                                   | 0.16                           | 29.27                               | 1.20                                |
| Maize, steamed                | 5        | 6.2                                | 0.14                                  | <0.20                             | <0.05                                  | 0.09                           | 21.33                               | 0.87                                |
| Mango, bush, dried            | 3        | 14                                 | 0.1                                   | <0.20                             | 0.07                                   | 0.06                           | 25.00                               | 18.78                               |
| Mango, fresh                  | 5        | 14                                 | 0.03                                  | <0.20                             | <0.05                                  | 0.06                           | 7.87                                | 0.16                                |
| Margarine                     | 6        | <5.0                               | <0.02                                 | <0.20                             | <0.05                                  | <0.01                          | 2.30                                | 0.00                                |
| Mayonnaise                    | 5        | <5.0                               | 0.03                                  | <0.20                             | 0.06                                   | <0.01                          | 2.91                                | 0.00                                |
| Meat beef, wet season         | 5        | <5.0                               | 0.33                                  | 1.5                               | 0.04                                   | 0.12                           | 44.34                               | 7.86                                |
| Meat chicken                  | 3        | 13                                 | 0.37                                  | 7                                 | 0.06                                   | 0.1                            | 67.41                               | 3.46                                |
| Meat, beef, dry season        | 3        | 21                                 | 0.4                                   | 34                                | 0.14                                   | 0.12                           | 88.36                               | 6.42                                |
| Meat, goat                    | 3        | 24                                 | 0.73                                  | 12                                | 0.05                                   | 0.1                            | 84.40                               | 14.12                               |
| Milk, condensed               | 5        | <5.0                               | 0.15                                  | 0.48                              | 0.35                                   | 0.05                           | 44.80                               | 1.82                                |
| Milk, fresh, dry season       | 5        | 7.2                                | 0.1                                   | 0.6                               | 0.22                                   | 0.06                           | 14.12                               | 1.52                                |
| Milk, fresh, wet season       | 2        | 11                                 | 0.19                                  | 0.39                              | 0.51                                   | 0.07                           | 31.47                               | 2.63                                |
| Milk, powder                  | 4        | 18                                 | 0.55                                  | 2.4                               | 0.79                                   | 0.55                           | 165.42                              | 6.20                                |
| Milk, sour                    | 5        | <5.0                               | 0.13                                  | 0.39                              | 0.31                                   | 0.06                           | 19.57                               | 2.63                                |
| Millet, dry season            | 5        | 32                                 | 0.16                                  | 1.2                               | 0.19                                   | 0.17                           | 9.12                                | 5.70                                |
| Millet, flour                 | 5        | 24                                 | 0.13                                  | 0.47                              | 0.06                                   | 0.16                           | 20.06                               | 3.29                                |
| Millet, porridge              | 5        | 15                                 | 0.1                                   | 0.9                               | 0.04                                   | 0.07                           | 10.89                               | 1.84                                |
| Millet, wet season            | 5        | 13                                 | 0.17                                  | 0.49                              | 0.05                                   | 0.17                           | 14.22                               | 2.58                                |
| Mustard                       | 4        | <5.0                               | 0.12                                  | <0.20                             | 0.01                                   | 0.02                           | 68.65                               | 0.66                                |
| Nyet                          | 1        | 13                                 | 0.84                                  | 12                                | 0.17                                   | 0.27                           | 37.67                               | 5652.3                              |
| Okra                          | 4        | 19                                 | 0.04                                  | 0.22                              | <0.01                                  | 0.02                           | 11.11                               | 4.90                                |

| <b>Ingredient</b>                         | <b>N</b> | <b>Folate<br/>(<math>\mu\text{g}</math>)<sup>1</sup></b> | <b>Methionine<br/>(g)<sup>2</sup></b> | <b>B12<br/>(<math>\mu\text{g}</math>)<sup>1,4</sup></b> | <b>Riboflavin<br/>(mg)<sup>2</sup></b> | <b>B6<br/>(mg)<sup>2</sup></b> | <b>Choline<br/>(mg)<sup>3</sup></b> | <b>Betaine<br/>(mg)<sup>3</sup></b> |
|-------------------------------------------|----------|----------------------------------------------------------|---------------------------------------|---------------------------------------------------------|----------------------------------------|--------------------------------|-------------------------------------|-------------------------------------|
| Okra, powder                              | 3        | 12                                                       | 0.08                                  | 0.91                                                    | 0.07                                   | 0.9                            | 26.48                               | 28.08                               |
| Onion                                     | 8        | 7.3                                                      | 0.02                                  | <0.20                                                   | <0.01                                  | 0.07                           | 6.40                                | 0.39                                |
| Palm oil                                  | 4        | <5.0                                                     | <0.02                                 | <0.20                                                   | <0.01                                  | <0.01                          | 0.62                                | 0.78                                |
| Pancake                                   | 3        | <5.0                                                     | 0.1                                   | 0.38                                                    | <0.01                                  | 0.05                           | 22.52                               | 56.04                               |
| Papaya                                    | 5        | 8                                                        | 0.02                                  | <0.20                                                   | <0.05                                  | 0.12                           | 6.76                                | 0.12                                |
| Potato                                    | 4        | 12                                                       | 0.06                                  | 0.5                                                     | <0.01                                  | 0.22                           | 131.44                              | 0.61                                |
| Pumpkin                                   | 5        | 6.6                                                      | 0.02                                  | 0.41                                                    | <0.01                                  | 0.06                           | 4.40                                | 0.09                                |
| Rice, dempetengo<br>(parched rice flakes) | 3        | 13                                                       | 0.18                                  | 0.97                                                    | <0.01                                  | 0.08                           | 10.83                               | 0.59                                |
| Rice, imported                            | 5        | 10                                                       | 0.21                                  | 0.89                                                    | <0.01                                  | 0.05                           | 4.11                                | 0.84                                |
| Rice, local                               | 6        | 7.8                                                      | 0.15                                  | 0.95                                                    | <0.01                                  | 0.04                           | 3.09                                | 0.14                                |
| Saf saf (condiment)                       | 2        | <5.0                                                     | <0.02                                 | <0.20                                                   | <0.01                                  | <0.01                          | 0.00                                | 0.00                                |
| Salt, lake                                | 5        | 5.6                                                      | <0.02                                 | <0.20                                                   | <0.01                                  | <0.01                          | 0.00                                | 0.00                                |
| Sardines, canned                          | 5        | 48                                                       | 0.59                                  | 13                                                      | 0.1                                    | 0.32                           | 54.38                               | 5.30                                |
| Seafood, crab, fresh                      | 3        | 27                                                       | 0.22                                  | 5.1                                                     | 0.09                                   | 0.07                           | 40.52                               | 247.51                              |
| Seafood, oyster, fresh                    | 3        | 13                                                       | 0.33                                  | 32                                                      | 0.03                                   | <0.01                          | 42.81                               | 260.11                              |
| Seafood, shrimps, fresh                   | 4        | 54                                                       | 0.7                                   | 7.4                                                     | 0.02                                   | 0.27                           | 79.85                               | 264.03                              |
| Seafood, shrimp, dry                      | 3        | 9.9                                                      | 0.71                                  | 1.4                                                     | <0.01                                  | 0.42                           | 117.00                              | 867.08                              |
| Sugar                                     | 4        | <5.0                                                     | <0.02                                 | 0.24                                                    | <0.01                                  | <0.01                          | 0.00                                | 0.58                                |
| Sweet Potato                              | 5        | 7.3                                                      | 0.04                                  | 0.93                                                    | <0.01                                  | 0.05                           | 11.31                               | 14.58                               |
| Tamarind                                  | 4        | <5.0                                                     | 0.04                                  | <0.20                                                   | <0.01                                  | 0.11                           | 7.51                                | 0.46                                |
| Tea                                       | 5        | <5.0                                                     | <0.02                                 | <0.20                                                   | <0.02                                  | 0.02                           | 34.30                               | 4.44                                |
| Tomato                                    | 5        | 12                                                       | <0.02                                 | <0.20                                                   | <0.01                                  | 0.16                           | 11.37                               | 0.16                                |
| Tomato paste                              | 4        | 8.8                                                      | 0.05                                  | 0.52                                                    | 0.04                                   | <0.60                          | 44.82                               | 0.64                                |
| Tomborungo (bush fruit)                   | 5        | <130                                                     | 0.05                                  | <0.20                                                   | <0.05                                  | 0.16                           | 19.61                               | 1.29                                |
| Vegetable oil                             | 3        | <5.0                                                     | <0.02                                 | <0.20                                                   | <0.01                                  | <0.01                          | 0.00                                | 0.00                                |
| Vinegar                                   | 4        | <5                                                       | <0.02                                 | <0.20                                                   | <0.01                                  | <0.01                          | 0.00                                | 0.00                                |
| Wheat, flour                              | 5        | 9.8                                                      | 0.18                                  | 0.49                                                    | <0.01                                  | 0.04                           | 11.71                               | 81.22                               |
| Wonjo (hibiscus flower<br>infusion)       | 3        | <5                                                       | <0.02                                 | <0.20                                                   | <0.02                                  | <0.01                          | 68.01                               | 277.16                              |

N= number of samples used for the composite sample

<sup>1</sup>Surface Plasmon Resonance Inhibition Assay

<sup>2</sup>HPLC

<sup>3</sup>LC/ESI IDMS

<sup>4</sup>Vitamin B12 assay is mainly designed to measure cyanocobalamin in vitamin B12-rich and fortified foods. Since vegetables are not main target matrices for the assay, it is suspected that vegetable products can give result measurable concentrations of vitamin B12 although not containing any vitamin. This is thought to be a matrix interference effect with the binding protein-surface interaction which usually occurs in samples which are blank for vitamin B12. Additionally, the extraction procedures may not be adequate for some of the vegetable samples tested and therefore, for the dietary intake analysis, foods of vegetal origin have been given value of 0  $\mu\text{g}$ .

**Supplemental Figure S1: Duration of follow-up of participants and sample size of dietary and biomarker data by month/total**

| Participants JIFFARONG      | JUL       | AUG       | SEP       | OCT       | NOV       | DEC       | JAN       | FEB       | MAR       | APR       | MAY       | JUN       | Total dietary | Total biomarkers |           |           |           |           |           |           |            |            |            |            |            |            |
|-----------------------------|-----------|-----------|-----------|-----------|-----------|-----------|-----------|-----------|-----------|-----------|-----------|-----------|---------------|------------------|-----------|-----------|-----------|-----------|-----------|-----------|------------|------------|------------|------------|------------|------------|
| 1                           |           |           |           |           |           |           |           |           |           |           |           |           | 2             | 2                |           |           |           |           |           |           |            |            |            |            |            |            |
| 2                           |           |           |           |           |           |           |           |           |           |           |           |           | 9             | 9                |           |           |           |           |           |           |            |            |            |            |            |            |
| 3                           |           |           |           |           |           |           |           |           |           |           |           |           | 12            | 12               |           |           |           |           |           |           |            |            |            |            |            |            |
| 4                           |           |           |           |           |           |           |           |           |           |           |           |           | 4             | 0                |           |           |           |           |           |           |            |            |            |            |            |            |
| 5                           |           |           |           |           |           |           |           |           |           |           |           |           | 10            | 10               |           |           |           |           |           |           |            |            |            |            |            |            |
| 6                           |           |           |           |           |           |           |           |           |           |           |           |           | 1             | 0                |           |           |           |           |           |           |            |            |            |            |            |            |
| 7                           |           |           |           |           |           |           |           |           |           |           |           |           | 2             | 0                |           |           |           |           |           |           |            |            |            |            |            |            |
| 8                           |           |           |           |           |           |           |           |           |           |           |           |           | 12            | 12               |           |           |           |           |           |           |            |            |            |            |            |            |
| 9                           |           |           |           |           |           |           |           |           |           |           |           |           | 2             | 2                |           |           |           |           |           |           |            |            |            |            |            |            |
| 10                          |           |           |           |           |           |           |           |           |           |           |           |           | 12            | 12               |           |           |           |           |           |           |            |            |            |            |            |            |
| 11                          |           |           |           |           |           |           |           |           |           |           |           |           | 3             | 0                |           |           |           |           |           |           |            |            |            |            |            |            |
| 12                          |           |           |           |           |           |           |           |           |           |           |           |           | 5             | 0                |           |           |           |           |           |           |            |            |            |            |            |            |
| 13                          |           |           |           |           |           |           |           |           |           |           |           |           | 5             | 5                |           |           |           |           |           |           |            |            |            |            |            |            |
| 14                          |           |           |           |           |           |           |           |           |           |           |           |           | 6             | 6                |           |           |           |           |           |           |            |            |            |            |            |            |
| 15                          |           |           |           |           |           |           |           |           |           |           |           |           | 6             | 4                |           |           |           |           |           |           |            |            |            |            |            |            |
| 16                          |           |           |           |           |           |           |           |           |           |           |           |           | 9             | 9                |           |           |           |           |           |           |            |            |            |            |            |            |
| 17                          |           |           |           |           |           |           |           |           |           |           |           |           | 5             | 4                |           |           |           |           |           |           |            |            |            |            |            |            |
| 18                          |           |           |           |           |           |           |           |           |           |           |           |           | 3             | 3                |           |           |           |           |           |           |            |            |            |            |            |            |
| 19                          |           |           |           |           |           |           |           |           |           |           |           |           | 3             | 3                |           |           |           |           |           |           |            |            |            |            |            |            |
| 20                          |           |           |           |           |           |           |           |           |           |           |           |           | 1             | 0                |           |           |           |           |           |           |            |            |            |            |            |            |
| 21                          |           |           |           |           |           |           |           |           |           |           |           |           | 2             | 2                |           |           |           |           |           |           |            |            |            |            |            |            |
| 22                          |           |           |           |           |           |           |           |           |           |           |           |           | 2             | 2                |           |           |           |           |           |           |            |            |            |            |            |            |
| 23                          |           |           |           |           |           |           |           |           |           |           |           |           | 1             | 1                |           |           |           |           |           |           |            |            |            |            |            |            |
| 24                          |           |           |           |           |           |           |           |           |           |           |           |           | 2             | 2                |           |           |           |           |           |           |            |            |            |            |            |            |
| <b>Total per month (Ji)</b> | <b>10</b> | <b>7</b>  | <b>10</b> | <b>7</b>  | <b>9</b>  | <b>6</b>  | <b>10</b> | <b>7</b>  | <b>10</b> | <b>9</b>  | <b>10</b> | <b>9</b>  | <b>10</b>     | <b>9</b>         | <b>10</b> | <b>9</b>  | <b>10</b> | <b>9</b>  | <b>10</b> | <b>10</b> | <b>119</b> | <b>100</b> |            |            |            |            |
| Participants JANNEH KUNDA   | JUL       | AUG       | SEP       | OCT       | NOV       | DEC       | JAN       | FEB       | MAR       | APR       | MAY       | JUN       |               |                  |           |           |           |           |           |           |            |            |            |            |            |            |
| 25                          |           |           |           |           |           |           |           |           |           |           |           |           | 2             | 2                |           |           |           |           |           |           |            |            |            |            |            |            |
| 26                          |           |           |           |           |           |           |           |           |           |           |           |           | 3             | 3                |           |           |           |           |           |           |            |            |            |            |            |            |
| 27                          |           |           |           |           |           |           |           |           |           |           |           |           | 2             | 0                |           |           |           |           |           |           |            |            |            |            |            |            |
| 28                          |           |           |           |           |           |           |           |           |           |           |           |           | 1             | 0                |           |           |           |           |           |           |            |            |            |            |            |            |
| 29                          |           |           |           |           |           |           |           |           |           |           |           |           | 3             | 2                |           |           |           |           |           |           |            |            |            |            |            |            |
| 30                          |           |           |           |           |           |           |           |           |           |           |           |           | 11            | 11               |           |           |           |           |           |           |            |            |            |            |            |            |
| 31                          |           |           |           |           |           |           |           |           |           |           |           |           | 12            | 11               |           |           |           |           |           |           |            |            |            |            |            |            |
| 32                          |           |           |           |           |           |           |           |           |           |           |           |           | 1             | 0                |           |           |           |           |           |           |            |            |            |            |            |            |
| 33                          |           |           |           |           |           |           |           |           |           |           |           |           | 11            | 11               |           |           |           |           |           |           |            |            |            |            |            |            |
| 34                          |           |           |           |           |           |           |           |           |           |           |           |           | 7             | 6                |           |           |           |           |           |           |            |            |            |            |            |            |
| 35                          |           |           |           |           |           |           |           |           |           |           |           |           | 11            | 11               |           |           |           |           |           |           |            |            |            |            |            |            |
| 36                          |           |           |           |           |           |           |           |           |           |           |           |           | 3             | 2                |           |           |           |           |           |           |            |            |            |            |            |            |
| 37                          |           |           |           |           |           |           |           |           |           |           |           |           | 6             | 6                |           |           |           |           |           |           |            |            |            |            |            |            |
| 38                          |           |           |           |           |           |           |           |           |           |           |           |           | 7             | 5                |           |           |           |           |           |           |            |            |            |            |            |            |
| 39                          |           |           |           |           |           |           |           |           |           |           |           |           | 9             | 9                |           |           |           |           |           |           |            |            |            |            |            |            |
| 40                          |           |           |           |           |           |           |           |           |           |           |           |           | 5             | 4                |           |           |           |           |           |           |            |            |            |            |            |            |
| 41                          |           |           |           |           |           |           |           |           |           |           |           |           | 9             | 9                |           |           |           |           |           |           |            |            |            |            |            |            |
| 42                          |           |           |           |           |           |           |           |           |           |           |           |           | 2             | 1                |           |           |           |           |           |           |            |            |            |            |            |            |
| 43                          |           |           |           |           |           |           |           |           |           |           |           |           | 4             | 4                |           |           |           |           |           |           |            |            |            |            |            |            |
| 44                          |           |           |           |           |           |           |           |           |           |           |           |           | 4             | 4                |           |           |           |           |           |           |            |            |            |            |            |            |
| 45                          |           |           |           |           |           |           |           |           |           |           |           |           | 3             | 3                |           |           |           |           |           |           |            |            |            |            |            |            |
| 46                          |           |           |           |           |           |           |           |           |           |           |           |           | 2             | 2                |           |           |           |           |           |           |            |            |            |            |            |            |
| 47                          |           |           |           |           |           |           |           |           |           |           |           |           | 1             | 1                |           |           |           |           |           |           |            |            |            |            |            |            |
| <b>Total per month (JK)</b> | <b>10</b> | <b>7</b>  | <b>10</b> | <b>9</b>  | <b>10</b> | <b>8</b>  | <b>10</b> | <b>9</b>  | <b>10</b> | <b>10</b> | <b>10</b> | <b>9</b>  | <b>9</b>      | <b>9</b>         | <b>7</b>  | <b>10</b> | <b>9</b>  | <b>10</b> | <b>9</b>  | <b>10</b> | <b>10</b>  | <b>10</b>  | <b>10</b>  | <b>118</b> | <b>107</b> |            |
| Participants KENEBA         | JUL       | AUG       | SEP       | OCT       | NOV       | DEC       | JAN       | FEB       | MAR       | APR       | MAY       | JUN       |               |                  |           |           |           |           |           |           |            |            |            |            |            |            |
| 48                          |           |           |           |           |           |           |           |           |           |           |           |           | 10            | 8                |           |           |           |           |           |           |            |            |            |            |            |            |
| 49                          |           |           |           |           |           |           |           |           |           |           |           |           | 8             | 8                |           |           |           |           |           |           |            |            |            |            |            |            |
| 50                          |           |           |           |           |           |           |           |           |           |           |           |           | 2             | 1                |           |           |           |           |           |           |            |            |            |            |            |            |
| 51                          |           |           |           |           |           |           |           |           |           |           |           |           | 3             | 3                |           |           |           |           |           |           |            |            |            |            |            |            |
| 52                          |           |           |           |           |           |           |           |           |           |           |           |           | 12            | 12               |           |           |           |           |           |           |            |            |            |            |            |            |
| 53                          |           |           |           |           |           |           |           |           |           |           |           |           | 1             | 0                |           |           |           |           |           |           |            |            |            |            |            |            |
| 54                          |           |           |           |           |           |           |           |           |           |           |           |           | 11            | 11               |           |           |           |           |           |           |            |            |            |            |            |            |
| 55                          |           |           |           |           |           |           |           |           |           |           |           |           | 12            | 12               |           |           |           |           |           |           |            |            |            |            |            |            |
| 56                          |           |           |           |           |           |           |           |           |           |           |           |           | 12            | 12               |           |           |           |           |           |           |            |            |            |            |            |            |
| 57                          |           |           |           |           |           |           |           |           |           |           |           |           | 10            | 9                |           |           |           |           |           |           |            |            |            |            |            |            |
| 58                          |           |           |           |           |           |           |           |           |           |           |           |           | 11            | 11               |           |           |           |           |           |           |            |            |            |            |            |            |
| 59                          |           |           |           |           |           |           |           |           |           |           |           |           | 10            | 8                |           |           |           |           |           |           |            |            |            |            |            |            |
| 60                          |           |           |           |           |           |           |           |           |           |           |           |           | 8             | 8                |           |           |           |           |           |           |            |            |            |            |            |            |
| 61                          |           |           |           |           |           |           |           |           |           |           |           |           | 4             | 4                |           |           |           |           |           |           |            |            |            |            |            |            |
| 62                          |           |           |           |           |           |           |           |           |           |           |           |           | 2             | 2                |           |           |           |           |           |           |            |            |            |            |            |            |
| <b>Total per month (Ke)</b> | <b>9</b>  | <b>8</b>  | <b>10</b> | <b>9</b>  | <b>10</b> | <b>10</b> | <b>9</b>  | <b>9</b>  | <b>9</b>  | <b>10</b> | <b>10</b> | <b>9</b>  | <b>10</b>     | <b>9</b>         | <b>10</b> | <b>9</b>  | <b>10</b> | <b>9</b>  | <b>10</b> | <b>9</b>  | <b>10</b>  | <b>8</b>   | <b>116</b> | <b>109</b> |            |            |
| <b>Total per month</b>      | <b>29</b> | <b>22</b> | <b>30</b> | <b>25</b> | <b>29</b> | <b>24</b> | <b>29</b> | <b>25</b> | <b>29</b> | <b>28</b> | <b>30</b> | <b>29</b> | <b>28</b>     | <b>27</b>        | <b>29</b> | <b>26</b> | <b>30</b> | <b>27</b> | <b>30</b> | <b>27</b> | <b>30</b>  | <b>28</b>  | <b>30</b>  | <b>28</b>  | <b>353</b> | <b>316</b> |

Dietary data    Ji: Jiffarong; JK: Janneh Kunda; Ke: Keneba  
 Biomarker data    Total dietary/biomarkers: number of months of data analysed

The graph shows the duration of participation in the study of the different women enrolled. Women did not stay until the end of the study for different reasons such as self-withdrawal or pregnancy (n=359 person/month). The number of biomarkers is lower than the number for dietary assessments, as on some occasions it was not possible to get a blood sample, or the samples collected were rejected for other reasons (n=316;293 for riboflavin).

Exclusion criteria were: pregnancy, severe anaemia (<70 g/L), menopause, contraceptive use or planning to move away from the village during the course of the study. No woman was excluded on the basis of malaria or severe anaemia, but four women were treated for mild anaemia.
